# Supplementary material for: Epigallocatechin-3-gallate attenuates acute pancreatitis induced lung injury by targeting mitochondrial reactive oxygen species triggered NLRP3 inflammasome activation
Source: Royal Society of Chemistry journal article supplement (doi:10.1039/d1fo01154e), 2021-01-01
Supplement: d1fo01154e1.pdf [file d1fo01154e1.pdf]

### Supplemental Figures

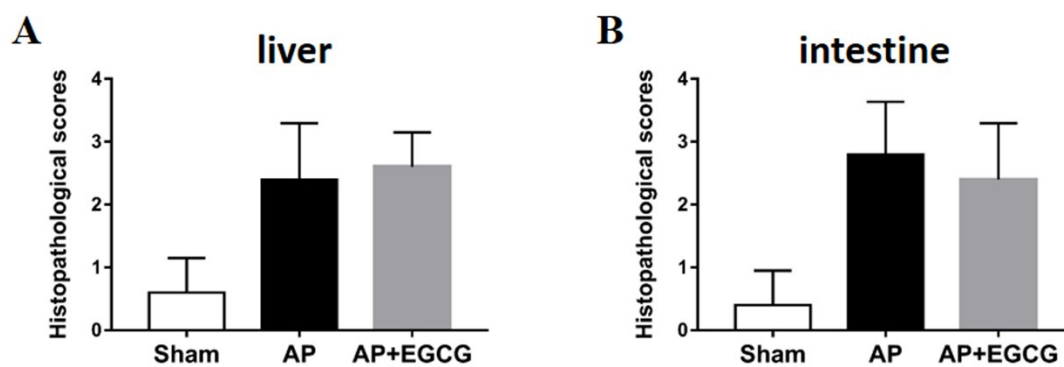

Fig. 1. The histopathological scores of liver (A) and intestine (B). Data are representative of five samples per treatment group.

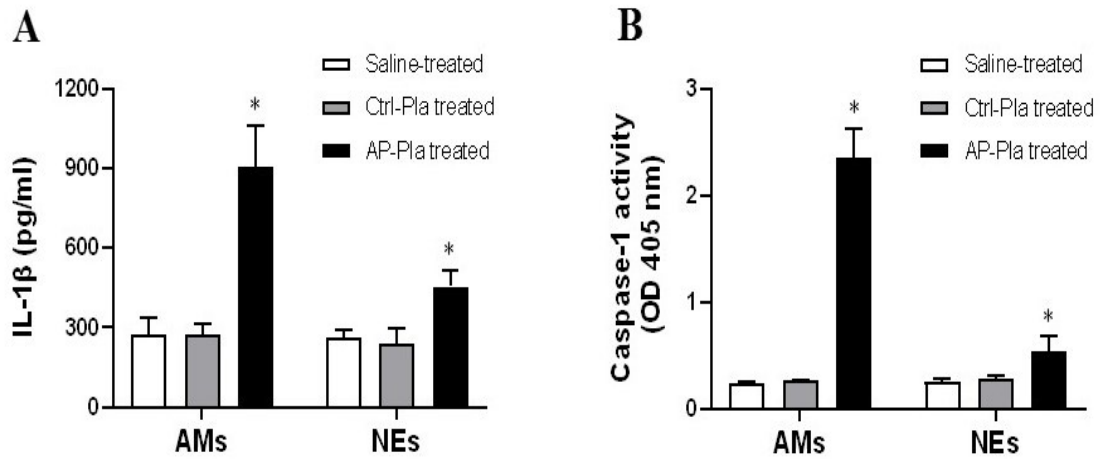

Fig. 2. The NLRP3 inflammasome activation in AMs and neutrophils in response to AP-conditioned plasma. AMs and neutrophils (NEs) were cultured with AP-conditioned plasma (AP-Pla) or control plasma for 24 h. NLRP3 inflammasome activation was evaluated by measuring the concentration of IL-1 $\beta$  (A) and the caspase-1 activity (B) in culture supernatants. Data are representative of three independent experiments. \* $p < 0.05$ , compared with the group treated with only saline.
